# Supplementary material for: Litchi–associated Acute Encephalitis in Children, Northern Vietnam, 2004–2009
Source: PubMed Central journal article supplement (PMC3559149; doi:10.3201/eid1811.111761), 2012-11
Supplement: 11-1761-Techapp-s1.pdf [file 11-1761-Techapp-s1.pdf]

# Litchi-associated Acute Encephalitis in Children, Northern Vietnam, 2004–2009

## Technical Appendix

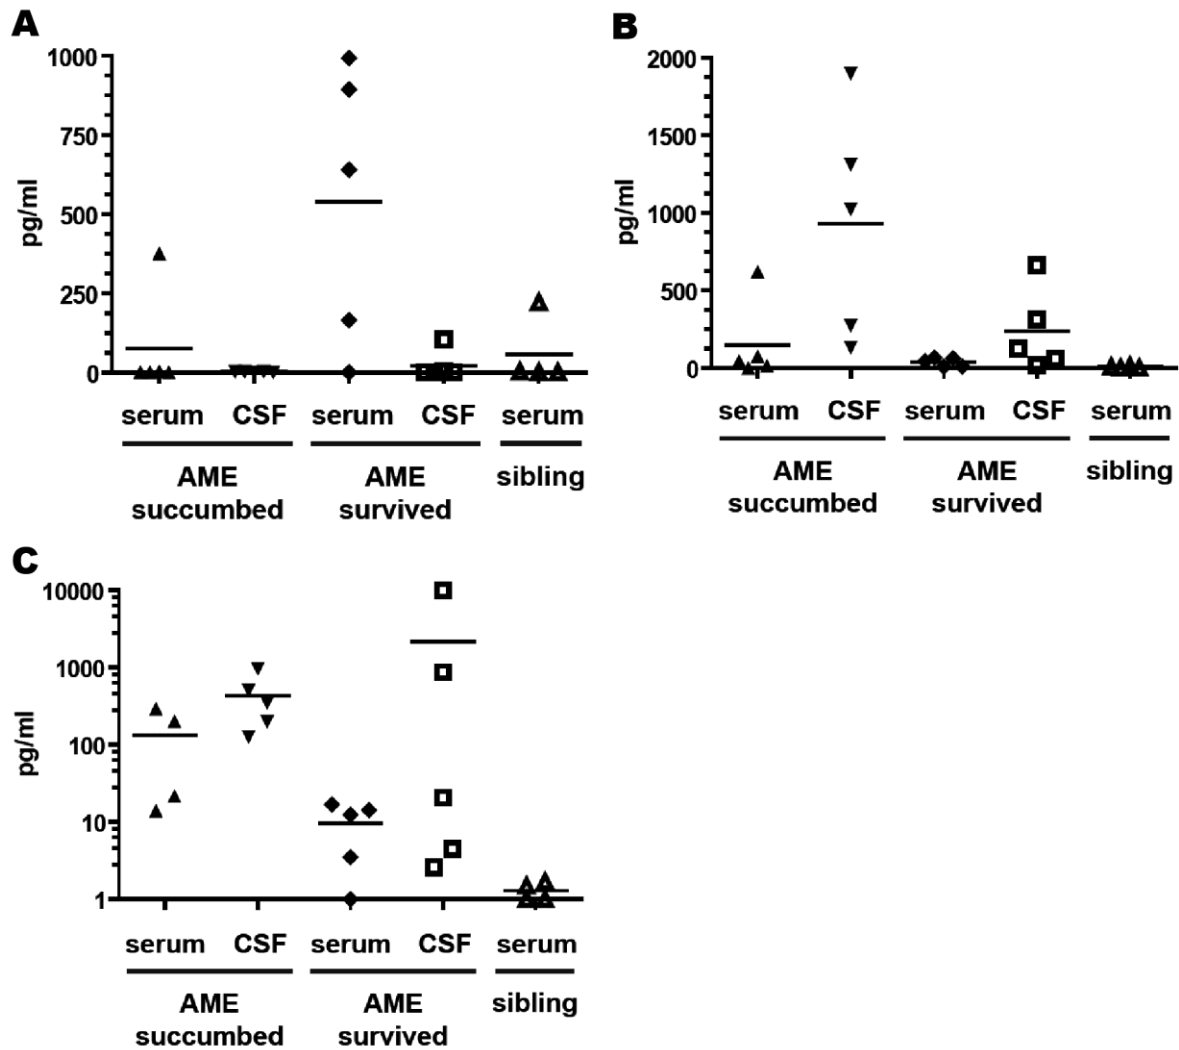

Technical Appendix Figure. Cerebrospinal fluid and serum concentrations of 3 immune mediators: interferon- $\alpha_2$  (IFN- $\alpha_2$ ) (A), interleukin 8 (IL-8) (B), and IL-6 (C) in 10 children with Ac Mong encephalitis (5 who survived and 5 who died of the disease) and 4 asymptomatic siblings as controls, Bac Giang Province, Vietnam, 2004–2009.
